# Supplementary material for: Ten new coordination polymers based on 3-carboxy-1-(4′-carboxybenzyl)-2-oxidopyridinium and different N-donor ligands: syntheses, structures, and photoluminescent properties
Source: Royal Society of Chemistry journal article supplement (doi:10.1039/c2ce25953b), 2012-01-01
Supplement: c2ce25953b.pdf [file c2ce25953b.pdf]

## Supplementary Material for CrystEngComm

# **Ten new coordination polymers based on 3-carboxy-1-(4'-carboxybenzyl)-2-oxidopyridinium and different N-donor ligands: syntheses, structures, and photoluminescent properties**

**Jia-Zhen Gao, Jin Yang,\* Ying-Ying Liu and Jian-Fang Ma\***

Key Lab of Polyoxometalate Science, Department of Chemistry, Northeast Normal University, Changchun 130024, People's Republic of China

\* Correspondence authors

E-mail: yangjinnenu@yahoo.com.cn (J. Yang)

E-mail: jianfangma@yahoo.com.cn (J.-F. Ma)

Fax: +86-431-85098620 (J.-F. Ma)

**Table S1a.** Selected bond distances (Å) and angles (°) for **1**

|                                 |            |                                              |            |
|---------------------------------|------------|----------------------------------------------|------------|
| Zn(1)-O(1) <sup>#1</sup>        | 1.945(2)   | Zn(1)-O(3)                                   | 2.023(2)   |
| Zn(1)-O(4)                      | 2.053(2)   | Zn(1)-O(5) <sup>#2</sup>                     | 2.075(2)   |
| Zn(1)-O(1W)                     | 2.078(3)   |                                              |            |
| O(1) <sup>#1</sup> -Zn(1)-O(3)  | 109.30(10) | O(1) <sup>#1</sup> -Zn(1)-O(4)               | 116.04(11) |
| O(3)-Zn(1)-O(4)                 | 86.51(9)   | O(1) <sup>#1</sup> -Zn(1)-O(5) <sup>#2</sup> | 99.89(10)  |
| O(3)-Zn(1)-O(5) <sup>#2</sup>   | 150.56(10) | O(4)-Zn(1)-O(5) <sup>#2</sup>                | 84.11(9)   |
| O(1) <sup>#1</sup> -Zn(1)-O(1W) | 96.33(11)  | O(3)-Zn(1)-O(1W)                             | 87.12(10)  |
| O(5) <sup>#2</sup> -Zn(1)-O(1W) | 85.89(10)  | O(4)-Zn(1)-O(1W)                             | 147.29(11) |

**Table S1b.** Hydrogen bonds for **1** (Å and °)

| D-H...A                          | d(D-H)     | d(H...A)  | d(D...A) | <(DHA) |
|----------------------------------|------------|-----------|----------|--------|
| O(1W)-H(1A)...O(2) <sup>#4</sup> | 0.8991(10) | 1.771(15) | 2.649(4) | 165(4) |
| O(1W)-H(1B)...O(4) <sup>#2</sup> | 0.890(10)  | 2.16(3)   | 2.814(4) | 130(3) |

Symmetry transformations used to generate equivalent atoms: <sup>#1</sup> -x+1, -y+1, -z+1; <sup>#2</sup> -x+3/2, y-1/2, -z+1/2; <sup>#3</sup> -x+3/2, y+1/2, -z+1/2; <sup>#4</sup> -x+1, -y, -z+1.

**Table S2a.** Selected bond distances (Å) and angles (°) for **2**

|                               |            |                                              |            |
|-------------------------------|------------|----------------------------------------------|------------|
| Zn(1)-O(4)                    | 1.971(3)   | Zn(1)-N(2)                                   | 1.984(4)   |
| Zn(1)-O(3)                    | 2.004(3)   | Zn(1)-O(1) <sup>#1</sup>                     | 2.011(3)   |
| Zn(1)-O(2) <sup>#1</sup>      | 2.392(3)   |                                              |            |
| O(4)-Zn(1)-N(2)               | 104.29(15) | O(4)-Zn(1)-O(3)                              | 90.23(12)  |
| N(2)-Zn(1)-O(3)               | 107.98(13) | O(4)-Zn(1)-O(1) <sup>#1</sup>                | 107.04(14) |
| N(2)-Zn(1)-O(1) <sup>#1</sup> | 133.20(14) | O(3)-Zn(1)-O(1) <sup>#1</sup>                | 105.77(14) |
| O(4)-Zn(1)-O(2) <sup>#1</sup> | 165.27(14) | N(2)-Zn(1)-O(2) <sup>#1</sup>                | 89.65(13)  |
| O(3)-Zn(1)-O(2) <sup>#1</sup> | 89.96(13)  | O(1) <sup>#1</sup> -Zn(1)-O(2) <sup>#1</sup> | 58.84(12)  |

**Table S2b.** Hydrogen bonds for **2** (Å and °)

| D-H...A                           | d(D-H) | d(H...A) | d(D...A)  | <(DHA) |
|-----------------------------------|--------|----------|-----------|--------|
| O(1W)-H(1A)...O(1W) <sup>#3</sup> | 0.90   | 2.44     | 3.148(13) | 135.4  |
| O(2W)-H(2B)...O(1W) <sup>#4</sup> | 0.93   | 2.15     | 2.996(10) | 150.5  |

O(1W)-H(1B)···O(5)<sup>#4</sup> 0.91 1.98 2.818(7) 153.2

Symmetry transformations used to generate equivalent at: <sup>#1</sup> -x+3, -y+1, -z; <sup>#2</sup> -x+1, -y+1, -z+1; <sup>#3</sup> -x+4, -y+1, -z-1; <sup>#4</sup> -x+3, -y, -z.

**Table S3a.** Selected bond distances (Å) and angles (°) for **3**

|                               |            |                                              |            |
|-------------------------------|------------|----------------------------------------------|------------|
| Zn(1)-O(4)                    | 1.966(3)   | Zn(1)-N(2)                                   | 1.993(4)   |
| Zn(1)-O(3)                    | 1.974(3)   | Zn(1)-O(1) <sup>#1</sup>                     | 2.044(3)   |
| Zn(1)-O(2) <sup>#1</sup>      | 2.328(3)   |                                              |            |
| O(4)-Zn(1)-N(2)               | 101.50(14) | O(4)-Zn(1)-O(3)                              | 92.94(12)  |
| O(3)-Zn(1)-N(2)               | 112.34(14) | O(4)-Zn(1)-O(1) <sup>#1</sup>                | 101.95(13) |
| N(2)-Zn(1)-O(1) <sup>#1</sup> | 132.32(13) | O(3)-Zn(1)-O(1) <sup>#1</sup>                | 107.23(13) |
| O(4)-Zn(1)-O(2) <sup>#1</sup> | 161.41(13) | N(2)-Zn(1)-O(2) <sup>#1</sup>                | 90.96(13)  |
| O(3)-Zn(1)-O(2) <sup>#1</sup> | 95.01(12)  | O(1) <sup>#1</sup> -Zn(1)-O(2) <sup>#1</sup> | 59.62(12)  |

**Table S3b.** Hydrogen bonds for **3** (Å and °)

| D-H···A                           | d(D-H) | d(H···A) | d(D···A) | <(DHA) |
|-----------------------------------|--------|----------|----------|--------|
| O(1W)-H(1B)···O(2W) <sup>#3</sup> | 0.92   | 1.88     | 2.748(7) | 157.6  |
| O(1W)-H(1A)···O(2) <sup>#4</sup>  | 0.92   | 2.03     | 2.938(6) | 170.0  |
| O(2W)-H(2B)···O(1W)               | 0.91   | 2.04     | 2.764(7) | 135.7  |
| O(2W)-H(2A)···O(5)                | 0.90   | 1.92     | 2.728(6) | 148.9  |

Symmetry transformations used to generate equivalent at: <sup>#1</sup> -x, -y, -z+2; <sup>#2</sup> -x+2, -y, -z+1; <sup>#3</sup> -x+1, -y+1, -z+1; <sup>#4</sup> x+1, y+1, z-1.

**Table S4a.** Selected bond distances (Å) and angles (°) for **4**

|                                 |            |                                |            |
|---------------------------------|------------|--------------------------------|------------|
| Zn(1)-O(1) <sup>#1</sup>        | 2.028(2)   | Zn(1)-O(4)                     | 2.031(3)   |
| Zn(1)-N(2)                      | 2.038(3)   | Zn(1)-O(3)                     | 2.107(3)   |
| Zn(1)-O(2W)                     | 2.119(3)   | Zn(1)-O(2) <sup>#1</sup>       | 2.417(3)   |
| O(1) <sup>#1</sup> -Zn(1)-O(4)  | 109.91(11) | O(1) <sup>#1</sup> -Zn(1)-N(2) | 150.02(12) |
| O(4)-Zn(1)-N(2)                 | 99.88(12)  | O(1) <sup>#1</sup> -Zn(1)-O(3) | 94.10(11)  |
| O(4)-Zn(1)-O(3)                 | 85.08(11)  | N(2)-Zn(1)-O(3)                | 91.64(12)  |
| O(1) <sup>#1</sup> -Zn(1)-O(2W) | 87.36(10)  | O(4)-Zn(1)-O(2W)               | 91.18(12)  |

|                                              |           |                               |            |
|----------------------------------------------|-----------|-------------------------------|------------|
| N(2)-Zn(1)-O(2W)                             | 88.79(11) | O(3)-Zn(1)-O(2W)              | 176.25(11) |
| O(1) <sup>#1</sup> -Zn(1)-O(2) <sup>#1</sup> | 58.08(9)  | O(4)-Zn(1)-O(2) <sup>#1</sup> | 165.00(10) |
| N(2)-Zn(1)-O(2) <sup>#1</sup>                | 92.97(11) | O(3)-Zn(1)-O(2) <sup>#1</sup> | 86.87(10)  |
| O(2W)-Zn(1)-O(2) <sup>#1</sup>               | 96.82(11) |                               |            |

**Table S4b.** Hydrogen bonds for **4** (Å and °)

| D-H...A                          | d(D-H) | d(H...A) | d(D...A) | <(DHA) |
|----------------------------------|--------|----------|----------|--------|
| O(2W)-H(2B)...N(4) <sup>#5</sup> | 0.89   | 2.01     | 2.898(4) | 177.1  |
| O(1W)-H(1A)...O(2) <sup>#3</sup> | 0.89   | 1.96     | 2.854(4) | 177.3  |
| O(2W)-H(2A)...O(4) <sup>#4</sup> | 0.89   | 1.92     | 2.797(4) | 167.4  |
| O(1W)-H(1B)...O(5)               | 0.89   | 1.96     | 2.808(4) | 159.1  |

Symmetry transformations used to generate equivalent atoms: <sup>#1</sup> -x+1/2, -y+3/2, -z+1; <sup>#2</sup> -x, y, -z+1/2; <sup>#3</sup> -x+1/2, y+1/2, -z+3/2; <sup>#4</sup> -x, -y+2, -z+1; <sup>#5</sup> x, y-1, z.

**Table S5a.** Selected bond distances (Å) and angles (°) for **5**

|                                              |            |                                |           |
|----------------------------------------------|------------|--------------------------------|-----------|
| Zn(1)-O(1)                                   | 1.948(2)   | Zn(1)-O(4) <sup>#1</sup>       | 2.004(2)  |
| Zn(1)-O(3) <sup>#1</sup>                     | 2.045(2)   | Zn(1)-N(2)                     | 2.115(2)  |
| Zn(1)-N(3)                                   | 2.139(2)   |                                |           |
| O(1)-Zn(1)-O(4) <sup>#1</sup>                | 94.84(9)   | O(1)-Zn(1)-O(3) <sup>#1</sup>  | 107.59(9) |
| O(4) <sup>#1</sup> -Zn(1)-O(3) <sup>#1</sup> | 87.63(8)   | O(1)-Zn(1)-N(2)                | 116.74(9) |
| O(4) <sup>#1</sup> -Zn(1)-N(2)               | 148.10(10) | O(1)-Zn(1)-N(3)                | 105.53(9) |
| O(3) <sup>#1</sup> -Zn(1)-N(2)               | 87.00(8)   | O(4) <sup>#1</sup> -Zn(1)-N(3) | 89.69(8)  |
| O(3) <sup>#1</sup> -Zn(1)-N(3)               | 146.87(9)  | N(2)-Zn(1)-N(3)                | 78.11(9)  |

**Table S5b.** Hydrogen bonds for **5** (Å and °)

| D-H...A                          | d(D-H) | d(H...A) | d(D...A) | <(DHA) |
|----------------------------------|--------|----------|----------|--------|
| O(1W)-H(1A)...O(5)               | 0.89   | 2.15     | 3.020(3) | 165.8  |
| O(1W)-H(1B)...O(4) <sup>#3</sup> | 0.89   | 2.29     | 3.152(3) | 162.9  |
| C(11)-H(11)...O(2) <sup>#4</sup> | 0.93   | 2.49     | 3.121(5) | 125.5  |
| C(8)-H(8A)...O(5) <sup>#5</sup>  | 0.97   | 2.62     | 3.404(4) | 138.3  |

Symmetry transformations used to generate equivalent at: <sup>#1</sup> x+1/2, -y+1/2, z-1/2; <sup>#2</sup>

$x-1/2, -y+1/2, z+1/2$ ; <sup>#3</sup>  $-x-1, -y+1, -z+1$ ; <sup>#4</sup>  $x-1, y, z$ ; <sup>#5</sup>  $x+1/2, -y+1/2, z+1/2$ .

**Table S6a.** Selected bond distances (Å) and angles (°) for **6**

|                               |            |                               |            |
|-------------------------------|------------|-------------------------------|------------|
| Cu(1)-O(4)                    | 1.9262(18) | Cu(1)-O(3)                    | 1.9501(17) |
| Cu(1)-N(2)                    | 2.015(2)   | Cu(1)-N(3)                    | 2.032(2)   |
| Cu(1)-O(1) <sup>#1</sup>      | 2.120(2)   |                               |            |
| O(4)-Cu(1)-O(3)               | 91.87(7)   | O(4)-Cu(1)-N(2)               | 159.80(9)  |
| O(3)-Cu(1)-N(2)               | 89.82(8)   | O(4)-Cu(1)-N(3)               | 90.51(8)   |
| O(3)-Cu(1)-N(3)               | 160.46(9)  | N(2)-Cu(1)-N(3)               | 81.46(8)   |
| O(4)-Cu(1)-O(1) <sup>#1</sup> | 91.14(9)   | O(3)-Cu(1)-O(1) <sup>#1</sup> | 99.66(8)   |
| N(2)-Cu(1)-O(1) <sup>#1</sup> | 108.42(9)  | N(3)-Cu(1)-O(1) <sup>#1</sup> | 99.68(8)   |

**Table S6b.** Hydrogen bonds for **6** (Å and °)

| D-H...A                          | d(D-H) | d(H...A) | d(D...A) | <(DHA) |
|----------------------------------|--------|----------|----------|--------|
| O(1W)-H(1B)...O(1) <sup>#3</sup> | 0.89   | 2.33     | 3.108(3) | 146.3  |
| O(1W)-H(1A)...O(5)               | 0.89   | 2.16     | 3.018(3) | 163.0  |
| C(10)-H(10)...O(2) <sup>#4</sup> | 0.93   | 2.73     | 3.218(4) | 114.0  |

Symmetry transformations used to generate equivalent atoms: <sup>#1</sup>  $x+1/2, -y+1/2, z-1/2$ ;  
<sup>#2</sup>  $x-1/2, -y+1/2, z+1/2$ ; <sup>#3</sup>  $-x+3/2, y+1/2, -z+3/2$ ; <sup>#4</sup>  $x+1, y, z$ .

**Table S7a.** Selected bond distances (Å) and angles (°) for **7**

|                                |            |                                              |            |
|--------------------------------|------------|----------------------------------------------|------------|
| Cd(1)-O(2')                    | 2.166(6)   | Cd(1)-O(5) <sup>#2</sup>                     | 2.360(3)   |
| Cd(1)-N(3)                     | 2.424(3)   | Cd(1)-N(2)                                   | 2.386(3)   |
| Cd(1)-O(1)                     | 2.397(9)   | Cd(1)-O(3) <sup>#1</sup>                     | 2.459(2)   |
| Cd(1)-O(4) <sup>#1</sup>       | 2.315(2)   |                                              |            |
| O(2')-Cd(1)-O(4) <sup>#1</sup> | 93.72(18)  | O(4) <sup>#1</sup> -Cd(1)-O(5) <sup>#2</sup> | 101.77(9)  |
| O(2')-Cd(1)-O(5) <sup>#2</sup> | 120.86(18) | O(4) <sup>#1</sup> -Cd(1)-N(2)               | 145.46(16) |
| O(2')-Cd(1)-N(2)               | 105.84(18) | O(5) <sup>#2</sup> -Cd(1)-N(2)               | 92.33(9)   |
| O(4) <sup>#1</sup> -Cd(1)-N(3) | 81.14(9)   | O(2')-Cd(1)-N(3)                             | 155.38(18) |
| O(5) <sup>#2</sup> -Cd(1)-N(3) | 83.73(9)   | N(2)-Cd(1)-N(3)                              | 69.20(10)  |

|                                              |            |                                |            |
|----------------------------------------------|------------|--------------------------------|------------|
| O(4) <sup>#1</sup> -Cd(1)-O(3) <sup>#1</sup> | 72.17(8)   | O(2')-Cd(1)-O(3) <sup>#1</sup> | 77.68(18)  |
| O(5) <sup>#2</sup> -Cd(1)-O(3) <sup>#1</sup> | 161.24(9)  | N(2)-Cd(1)-O(3) <sup>#1</sup>  | 84.40(9)   |
| N(3)-Cd(1)-O(3) <sup>#1</sup>                | 77.83(9)   | O(4) <sup>#1</sup> -Cd(1)-O(1) | 126.0(3)   |
| O(2)-Cd(1)-O(1)                              | 52.21(18)  | O(5) <sup>#2</sup> -Cd(1)-O(1) | 88.7(3)    |
| N(2)-Cd(1)-O(1)                              | 85.1(3)    | O(1)-Cd(1)-O(2)                | 52.0(3)    |
| O(3) <sup>#1</sup> -Cd(1)-O(2)               | 72.07(15)  | O(1)-Cd(1)-N(3)                | 152.8(3)   |
| O(1)-Cd(1)-O(3) <sup>#1</sup>                | 109.3(3)   | O(2')-Cd(1)-O(2)               | 13.04(19)  |
| O(4) <sup>#1</sup> -Cd(1)-O(2)               | 80.80(15)  | O(5) <sup>#2</sup> -Cd(1)-O(2) | 125.32(15) |
| N(2)-Cd(1)-O(2)                              | 116.12(15) | N(3)-Cd(1)-O(2)                | 148.42(15) |

Symmetry transformations used to generate equivalent atoms: <sup>#1</sup> x+1/2, y+1/2, z;  
<sup>#2</sup> -x+1/2, -y+1/2, -z+1; <sup>#3</sup> x-1/2, y-1/2, z.

**Table S8a.** Selected bond distances (Å) and angles (°) for **8**

|                                              |            |                               |            |
|----------------------------------------------|------------|-------------------------------|------------|
| Cd(1)-N(4)                                   | 2.238(5)   | Cd(1)-O(7) <sup>#1</sup>      | 2.292(4)   |
| Cd(1)-O(5) <sup>#1</sup>                     | 2.303(4)   | Cd(1)-O(1)                    | 2.381(4)   |
| Cd(1)-O(8) <sup>#1</sup>                     | 2.393(4)   | Cd(1)-O(2)                    | 2.426(4)   |
| Cd(2)-N(15) <sup>#2</sup>                    | 2.235(5)   | Cd(2)-O(6)                    | 2.294(5)   |
| Cd(2)-O(4)                                   | 2.293(4)   | Cd(2)-O(10)                   | 2.321(4)   |
| Cd(2)-O(3)                                   | 2.412(4)   | Cd(2)-O(9)                    | 2.540(4)   |
| Cd(3)-N(8)                                   | 2.231(5)   | Cd(3)-O(20)                   | 2.264(4)   |
| Cd(3)-O(13)                                  | 2.273(4)   | Cd(3)-O(15)                   | 2.423(5)   |
| Cd(3)-O(16)                                  | 2.270(4)   | Cd(3)-O(19)                   | 2.612(4)   |
| Cd(4)-O(17)                                  | 2.274(4)   | Cd(4)-N(7) <sup>#3</sup>      | 2.234(5)   |
| Cd(4)-O(11)                                  | 2.352(4)   | Cd(4)-O(14)                   | 2.289(5)   |
| Cd(4)-O(12)                                  | 2.418(4)   | Cd(4)-O(18)                   | 2.405(5)   |
| Cd(5)-N(12)                                  | 2.224(5)   | Cd(5)-O(22) <sup>#4</sup>     | 2.256(4)   |
| Cd(5)-O(23)                                  | 2.262(5)   | Cd(5)-O(25)                   | 2.271(4)   |
| Cd(5)-O(21) <sup>#4</sup>                    | 2.423(4)   | Cd(5)-O(24)                   | 2.562(5)   |
| N(4)-Cd(1)-O(7) <sup>#1</sup>                | 116.91(16) | N(4)-Cd(1)-O(5) <sup>#1</sup> | 86.55(17)  |
| O(7) <sup>#1</sup> -Cd(1)-O(5) <sup>#1</sup> | 93.99(15)  | N(4)-Cd(1)-O(1)               | 140.77(18) |

---

|                                              |             |                                              |             |
|----------------------------------------------|-------------|----------------------------------------------|-------------|
| O(7) <sup>#1</sup> -Cd(1)-O(1)               | 90.24(15)   | O(5) <sup>#1</sup> -Cd(1)-O(1)               | 121.19(15)  |
| N(4)-Cd(1)-O(8) <sup>#1</sup>                | 82.05(17)   | O(7) <sup>#1</sup> -Cd(1)-O(8) <sup>#1</sup> | 72.85(14)   |
| O(5) <sup>#1</sup> -Cd(1)-O(8) <sup>#1</sup> | 156.02(14)  | O(1)-Cd(1)-O(8) <sup>#1</sup>                | 79.71(15)   |
| N(4)-Cd(1)-O(2)                              | 101.93(16)  | O(7) <sup>#1</sup> -Cd(1)-O(2)               | 140.88(15)  |
| O(5) <sup>#1</sup> -Cd(1)-O(2)               | 92.80(16)   | O(1)-Cd(1)-O(2)                              | 53.94(16)   |
| O(8) <sup>#1</sup> -Cd(1)-O(2)               | 110.14(15)  | N(15) <sup>#2</sup> -Cd(2)-O(6)              | 86.76(18)   |
| N(15) <sup>#2</sup> -Cd(2)-O(4)              | 117.37(16)  | O(4)-Cd(2)-O(6)                              | 93.24(15)   |
| N(15) <sup>#2</sup> -Cd(2)-O(10)             | 141.54 (18) | O(6)-Cd(2)-O(10)                             | 120.03(16)  |
| N(15) <sup>#2</sup> -Cd(2)-O(6)              | 86.76(18)   | N(15) <sup>#2</sup> -Cd(2)-O(3)              | 82.45(18)   |
| O(4)-Cd(2)-O(10)                             | 90.03(15)   | O(4)-Cd(2)-O(3)                              | 72.87(14)   |
| O(6)-Cd(2)-O(3)                              | 155.72(15)  | N(15) <sup>#2</sup> -Cd(2)-O(9)              | 102. 62(17) |
| O(10)-Cd(2)-O(3)                             | 80.66(16)   | O(4)-Cd(2)-O(9)                              | 139.80(15)  |
| O(6)-Cd(2)-O(9)                              | 92.89(18)   | O(3)-Cd(2)-O(9)                              | 110.65(16)  |
| O(10)-Cd(2)-O(9)                             | 53.13(16)   | N(8)-Cd(3)-O(13)                             | 115.64(15)  |
| N(8)-Cd(3)-O(20)                             | 142.56(17)  | N(8)-Cd(3)-O(16)                             | 88.26(17)   |
| O(20)-Cd(3)-O(13)                            | 92.92(15)   | O(16)-Cd(3)-O(13)                            | 92.11(14)   |
| O(20)-Cd(3)-O(16)                            | 115.74(16)  | O(16)-Cd(3)-O(15)                            | 158.34(14)  |
| N(8)-Cd(3)-O(15)                             | 84.08(17)   | O(20)-Cd(3)-O(15)                            | 81.59(15)   |
| O(13)-Cd(3)-O(15)                            | 73.24(14)   | O(20)-Cd(3)-O(19)                            | 53.06(16)   |
| N(8)-Cd(3)-O(19)                             | 101.52(16)  | O(13)-Cd(3)-O(19)                            | 142.80(14)  |
| O(15)-Cd(3)-O(19)                            | 110.61(16)  | O(16)-Cd(3)-O(19)                            | 90.75(16)   |
| N(7) <sup>#3</sup> -Cd(4)-O(14)              | 87.83(18)   | N(7) <sup>#3</sup> -Cd(4)-O(17)              | 115.33(16)  |
| N(7) <sup>#3</sup> -Cd(4)-O(11)              | 142.19(18)  | O(17)-Cd(4)-O(14)                            | 92.46(15)   |
| O(14)-Cd(4)-O(11)                            | 117.10(17)  | O(17)-Cd(4)-O(11)                            | 92.81(15)   |
| O(17)-Cd(4)-O(18)                            | 73.09(14)   | N(7) <sup>#3</sup> -Cd(4)-O(18)              | 84.48(18)   |
| O(11)-Cd(4)-O(18)                            | 80.05(16)   | O(14)-Cd(4)-O(18)                            | 158.64(16)  |
| O(17)-Cd(4)-O(12)                            | 144.37(15)  | N(7) <sup>#3</sup> -Cd(4)-O(12)              | 100.23(15)  |
| O(11)-Cd(4)-O(12)                            | 54.65(17)   | O(14)-Cd(4)-O(12)                            | 90.97(17)   |
| N(12)-Cd(5)-O(22) <sup>#4</sup>              | 114.34(16)  | O(18)-Cd(4)-O(12)                            | 109.99(16)  |

---

|                                  |            |                                                |            |
|----------------------------------|------------|------------------------------------------------|------------|
| O(22) <sup>#4</sup> -Cd(5)-O(23) | 91.99 (16) | N(12)-Cd(5)-O(23)                              | 88.11(28)  |
| O(22) <sup>#4</sup> -Cd(5)-O(25) | 95.52(17)  | N(12)-Cd(5)-O(25)                              | 142.99(18) |
| O(21) <sup>#4</sup> -Cd(5)-O(24) | 110.02(18) | O(23)-Cd(5)-O(25)                              | 113.29(18) |
| N(12)-Cd(5)-O(21) <sup>#4</sup>  | 85.86(17)  | O(22) <sup>#4</sup> -Cd(5)-O(21) <sup>#4</sup> | 73.52(15)  |
| O(23)-Cd(5)-O(21) <sup>#4</sup>  | 160.22(15) | O(25)-Cd(5)-O(21) <sup>#4</sup>                | 82.09 (17) |
| N(12)-Cd(5)-O(24)                | 99.79(17)  | O(22) <sup>#4</sup> -Cd(5)-O(24)               | 145.87(15) |
| O(23)-Cd(5)-O(24)                | 89.56(19)  | O(25)-Cd(5)-O(24)                              | 53.18(18)  |

**Table S8b.** Hydrogen bonds for **8** (Å and °)

| D-H...A                           | d(D-H) | d(H...A) | d(D...A)  | <(DHA) |
|-----------------------------------|--------|----------|-----------|--------|
| O(1W)-H(1B)...O(5)                | 0.89   | 2.35     | 2.888(6)  | 119.0  |
| O(2W)-H(2A)...O(6) <sup>#6</sup>  | 0.90   | 2.38     | 2.935(7)  | 119.9  |
| O(2W)-H(2B)...O(9)                | 0.89   | 2.32     | 3.189(8)  | 164.9  |
| O(4W)-H(4A)...O(25)               | 0.91   | 2.91     | 3.324(11) | 108.5  |
| O(4W)-H(4B)...O(23) <sup>#4</sup> | 0.91   | 2.51     | 2.923(10) | 108.0  |
| O(5W)-H(5A)...O(16) <sup>#7</sup> | 0.93   | 2.08     | 2.936(7)  | 153.3  |

Symmetry transformations used to generate equivalent atoms: <sup>#1</sup> -x, -y+2, -z+2; <sup>#2</sup> x, y+1, z+1; <sup>#3</sup> x, y-1, z-1; <sup>#4</sup> -x, -y-1, -z+1; <sup>#5</sup> -x, -y, -z+2; <sup>#6</sup> -x, -y+1, -z+2; <sup>#7</sup> -x, -y, -z+1.

**Table S9a.** Selected bond distances (Å) and angles (°) for **9**

|                                |            |                               |            |
|--------------------------------|------------|-------------------------------|------------|
| Co(1)-O(4)                     | 2.005(3)   | Co(1)-N(2)                    | 2.055(4)   |
| Co(1)-O(1W)                    | 2.093(3)   | Co(1)-O(3)                    | 2.135(2)   |
| Co(1)-O(2) <sup>#1</sup>       | 2.180(3)   | Co(1)-O(1) <sup>#1</sup>      | 2.200(3)   |
| O(4)-Co(1)-N(2)                | 112.31(14) | O(4)-Co(1)-O(1W)              | 84.78(11)  |
| N(2)-Co(1)-O(1W)               | 94.04(14)  | O(4)-Co(1)-O(3)               | 84.80(10)  |
| N(2)-Co(1)-O(3)                | 88.83(14)  | O(1W)-Co(1)-O(3)              | 169.51(10) |
| O(4)-Co(1)-O(2) <sup>#1</sup>  | 97.44(11)  | N(2)-Co(1)-O(2) <sup>#1</sup> | 149.78(12) |
| O(1W)-Co(1)-O(2) <sup>#1</sup> | 93.83(10)  | O(3)-Co(1)-O(2) <sup>#1</sup> | 88.68(10)  |
| O(4)-Co(1)-O(1) <sup>#1</sup>  | 156.89(11) | N(2)-Co(1)-O(1) <sup>#1</sup> | 90.81(13)  |
| O(1W)-Co(1)-O(1) <sup>#1</sup> | 93.59(11)  | O(3)-Co(1)-O(1) <sup>#1</sup> | 96.46(10)  |



O(2)<sup>#1</sup>-Co(1)-O(1)<sup>#1</sup> 59.60(9)

Symmetry transformations used to generate equivalent atoms: <sup>#1</sup> x, -y+1, z+1/2; <sup>#2</sup> -x+3/2, -y+1/2, -z+1; <sup>#3</sup> x, -y+1, z-1/2.

**Table S10a.** Selected bond distances (Å) and angles (°) for **10**

|                      |           |                     |           |
|----------------------|-----------|---------------------|-----------|
| Ni(1)-O(4)           | 1.989(2)  | Ni(1)-O(4)#1        | 1.989(2)  |
| Ni(1)-O(3)           | 2.058(2)  | Ni(1)-N(2)          | 2.085(3)  |
| Ni(1)-O(3)#1         | 2.058(2)  | Ni(1)-N(2)#1        | 2.086(3)  |
| Ni(2)-O(5)#3         | 2.058(2)  | Ni(2)-O(1)          | 2.054(3)  |
| Ni(2)-O(5)#4         | 2.058(2)  | Ni(2)-O(1)#2        | 2.054(3)  |
| Ni(2)-O(3W)          | 2.091(2)  | Ni(2)-O(3W)#2       | 2.091(2)  |
| O(4)#1-Ni(1)-O(3)    | 91.59(9)  | O(4)-Ni(1)-O(3)     | 88.41(9)  |
| O(4)#1-Ni(1)-O(3)#1  | 88.41(9)  | O(4)-Ni(1)-O(3)#1   | 91.59(9)  |
| O(4)-Ni(1)-N(2)#1    | 90.54(11) | O(4)#1-Ni(1)-N(2)#1 | 89.46(11) |
| O(3)-Ni(1)-N(2)#1    | 87.11(11) | O(3)#1-Ni(1)-N(2)#1 | 92.89(11) |
| O(3)#1-Ni(1)-N(2)    | 87.11(11) | O(3)-Ni(1)-N(2)     | 92.89(11) |
| O(4)-Ni(1)-N(2)      | 89.46(11) | O(4)#1-Ni(1)-N(2)   | 90.54(11) |
| O(1)#2-Ni(2)-O(5)#3  | 88.90(12) | O(1)-Ni(2)-O(5)#4   | 88.90(12) |
| O(1)#2-Ni(2)-O(3W)   | 86.99(11) | O(1)-Ni(2)-O(5)#3   | 91.10(12) |
| O(5)#3-Ni(2)-O(3W)   | 96.20(10) | O(1)-Ni(2)-O(3W)    | 93.01(11) |
| O(5)#4-Ni(2)-O(3W)#2 | 96.20(10) | O(5)#4-Ni(2)-O(3W)  | 83.80(10) |
| O(5)#3-Ni(2)-O(3W)#2 | 83.80(10) | O(1)#2-Ni(2)-O(5)#4 | 91.10(12) |

**Table S10b.** Hydrogen bonds for **10** (Å and °)

| D-H...A               | d(D-H) | d(H...A) | d(D...A) | <(DHA) |
|-----------------------|--------|----------|----------|--------|
| O(3W)-H(3A)...O(4)#3  | 0.90   | 1.78     | 2.674(3) | 171.7  |
| O(3W)-H(3B)...O(2)    | 0.89   | 1.74     | 2.629(4) | 174.0  |
| O(2W)-H(2A)...O(1W)#7 | 0.90   | 2.27     | 3.044(9) | 143.8  |

Symmetry transformations used to generate equivalent atoms: <sup>#1</sup> -x+2, -y, -z+1; <sup>#2</sup> -x+2, -y-1, -z+3; <sup>#3</sup> -x+2, -y, -z+2; <sup>#4</sup> x, y-1, z+1; <sup>#5</sup> -x+2, -y, -z; <sup>#6</sup> x, y+1, z-1; <sup>#7</sup> x, y, z-1.

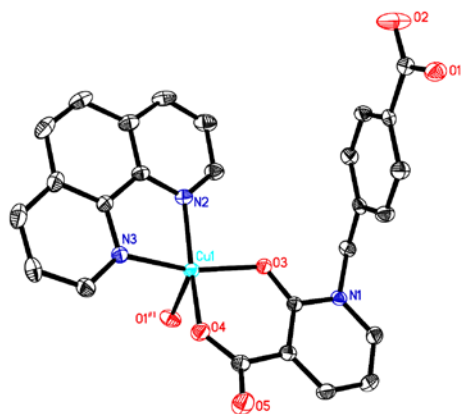

(a)

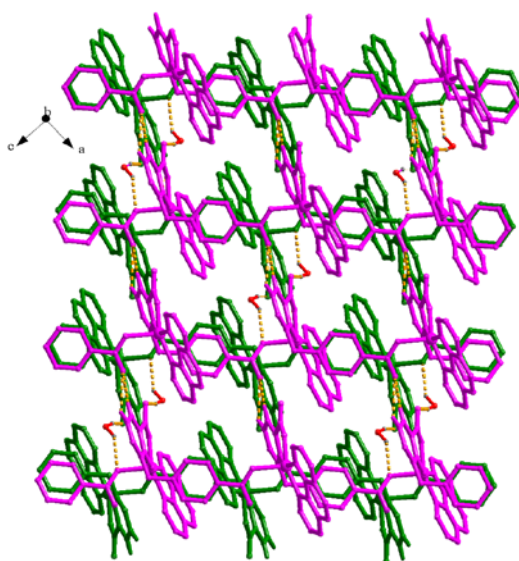

(b)

**Fig. S1** (a) ORTEP view of **6** showing the local coordination environment of Cu(II) atom with hydrogen atoms and lattice water molecule omitted for clarity (30% probability displacement ellipsoids). Symmetry codes: #1  $x+1/2, -y+1/2, z-1/2$ . (b) The 3D hydrogen-bonding structure of **6**.

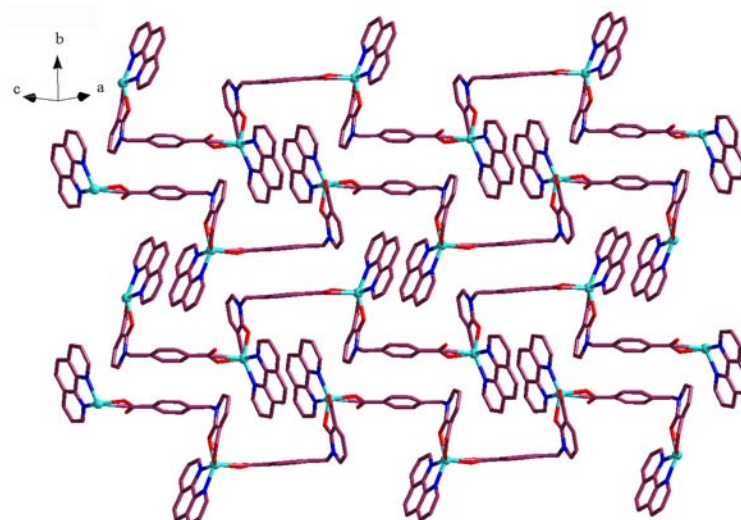

**Fig. S2** View of the 2D supramolecular layer connected by  $\pi$ - $\pi$  interactions of compound **5**.

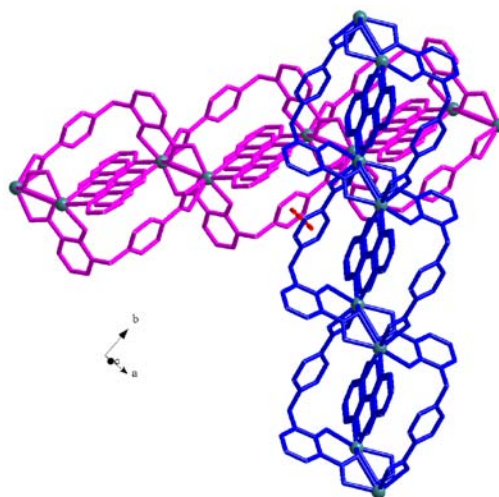

(d)

**Fig. S3** View of the  $\pi$ - $\pi$  interactions of **7**.

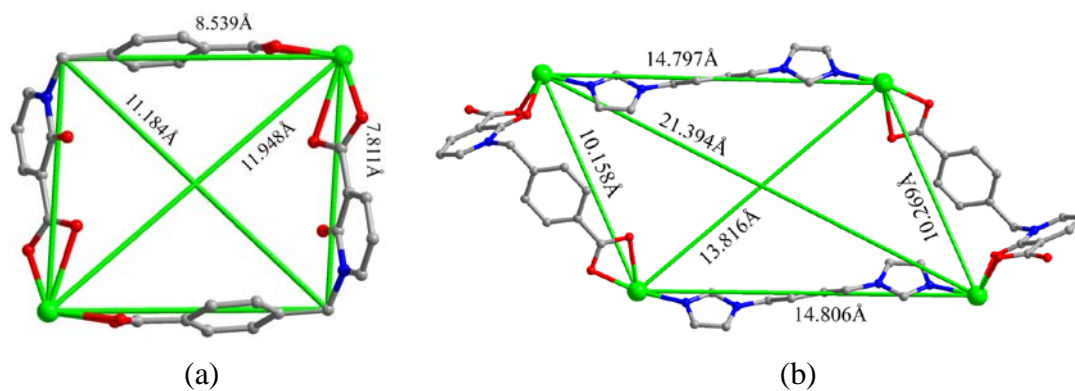

(a)

(b)

**Fig. S4** (a) Ball-and-stick representation of the  $[\text{Cd}(\text{L})_2\text{Cd}]$  26-membered ring. (b) Ball-and-stick representation of the large rectangular 44-membered ring  $[\text{Cd}_4(\text{L})_2(\text{biim-4})_2]$ .

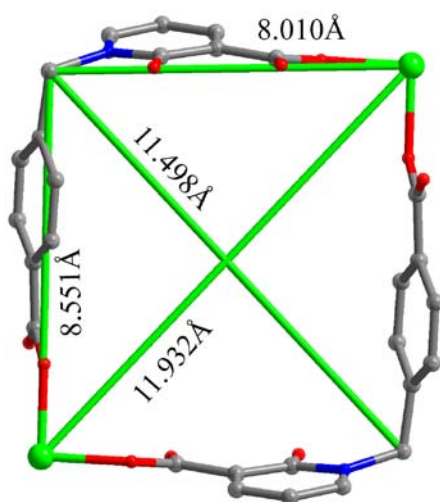

**Fig. S5** View of the [Ni<sub>2</sub>(L)<sub>2</sub>] ring in **10**.

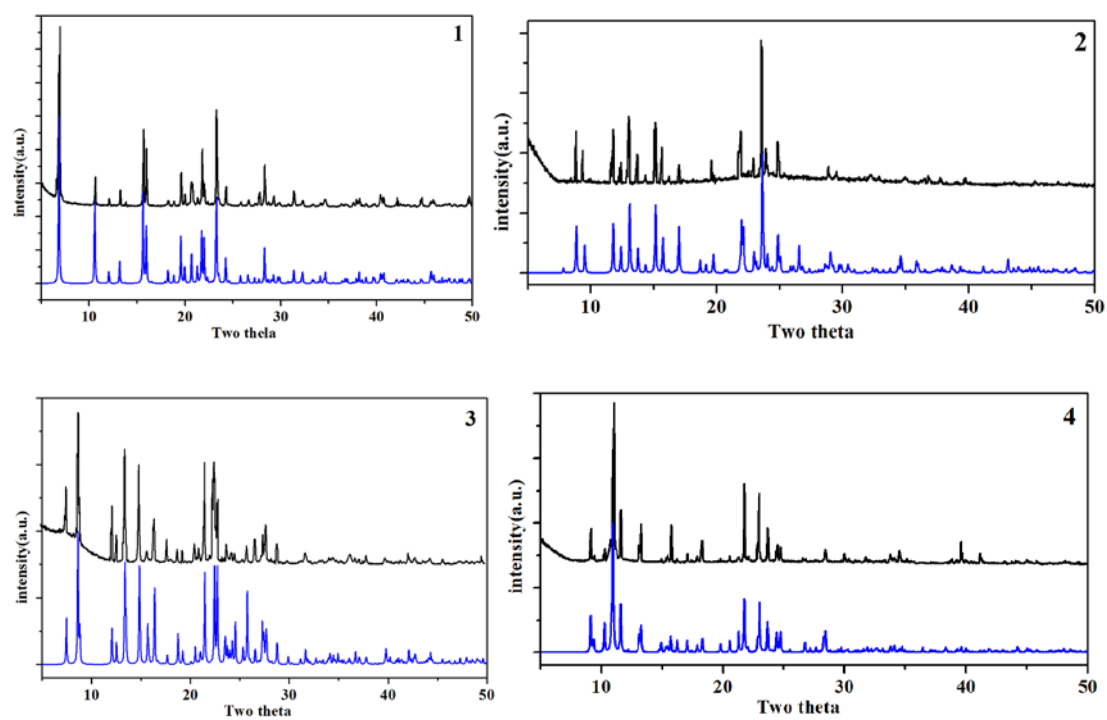

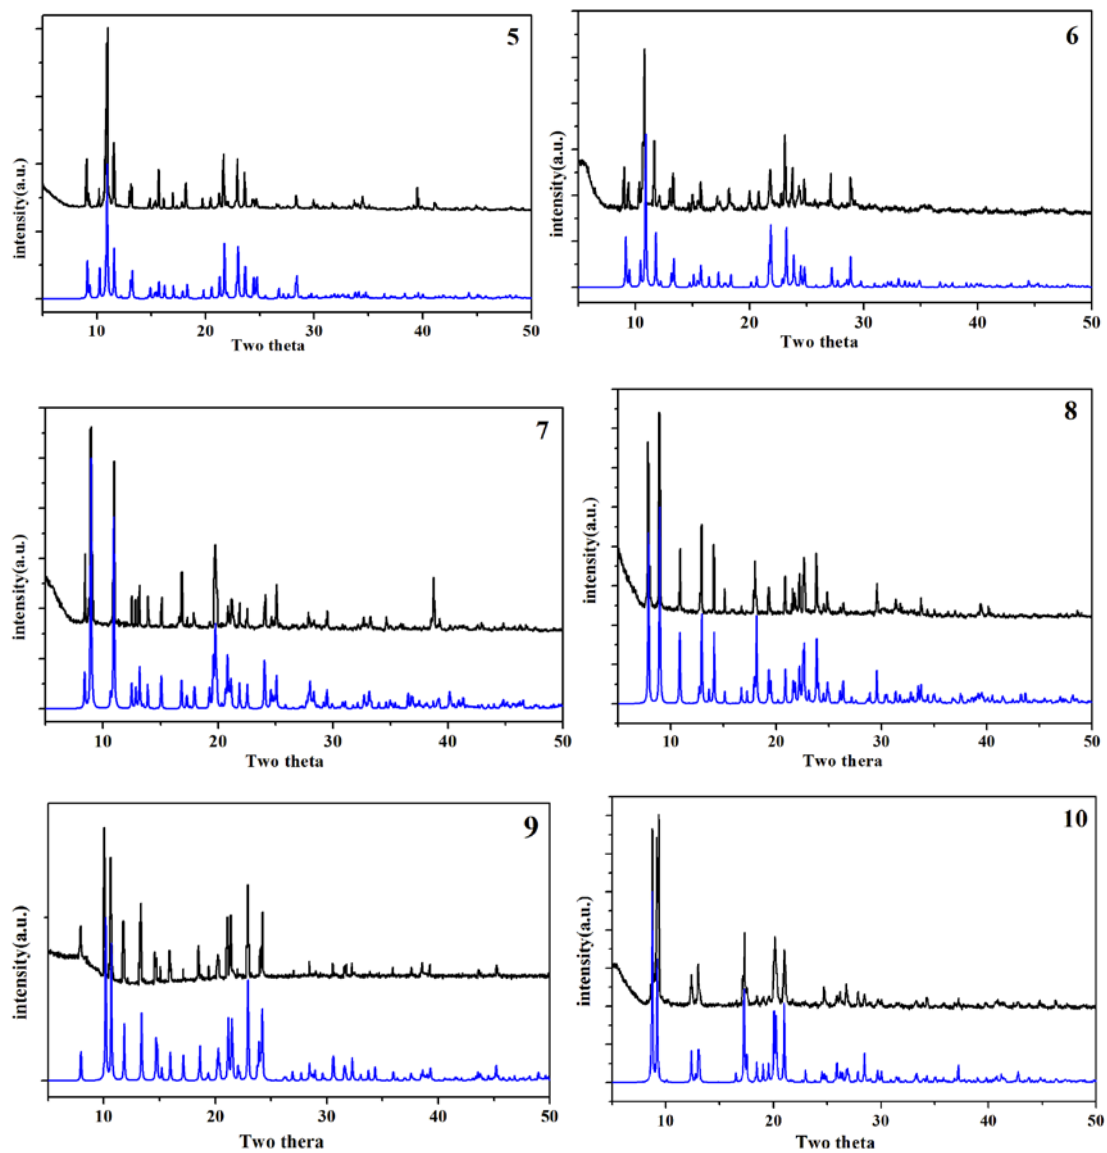

**Fig. S6** The simulated (blue) and experimental (black) PXRD patterns of **1–10**.

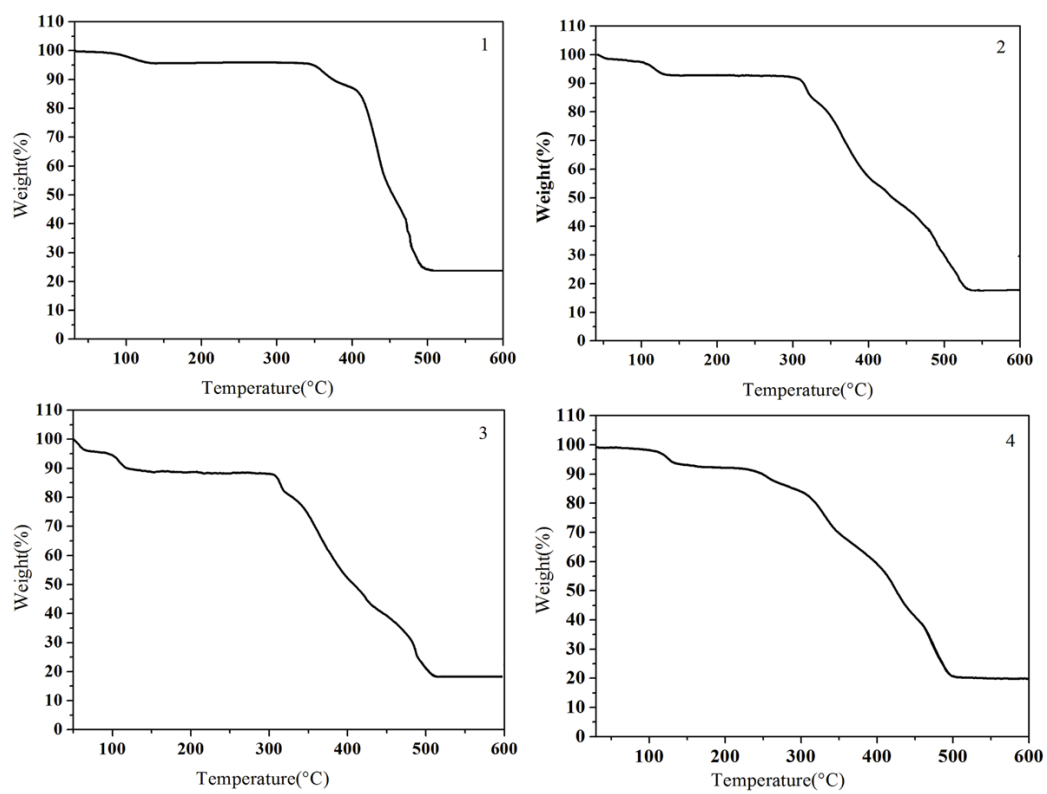

**Fig. S7** The TGA curves of compounds 1–4.

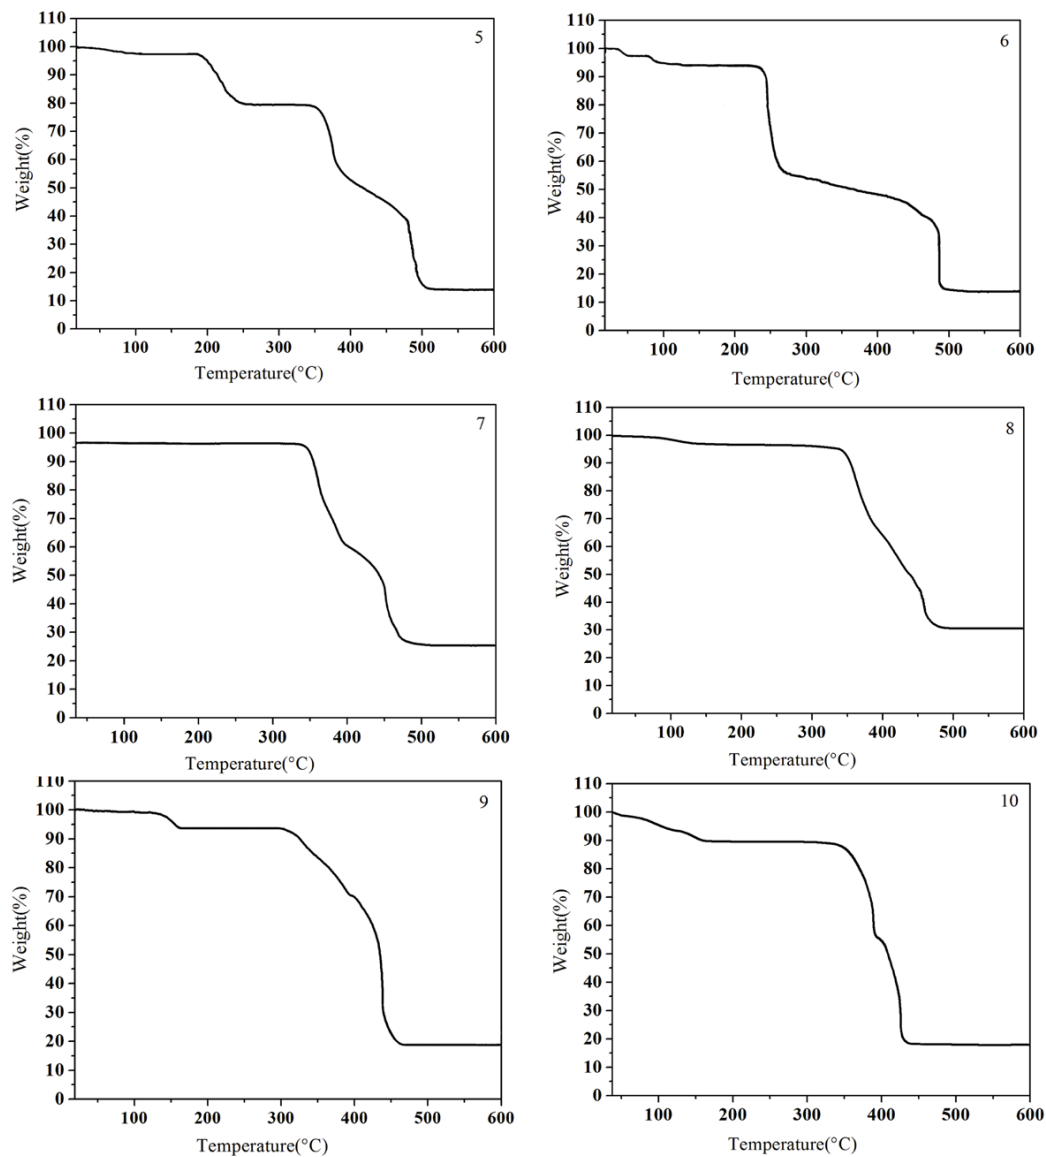

**Fig. S8** The TGA curves of compounds **5–10**.
